# Supplementary material
Source: PubMed Central journal article supplement (PMC7670146)

# Total human IgG

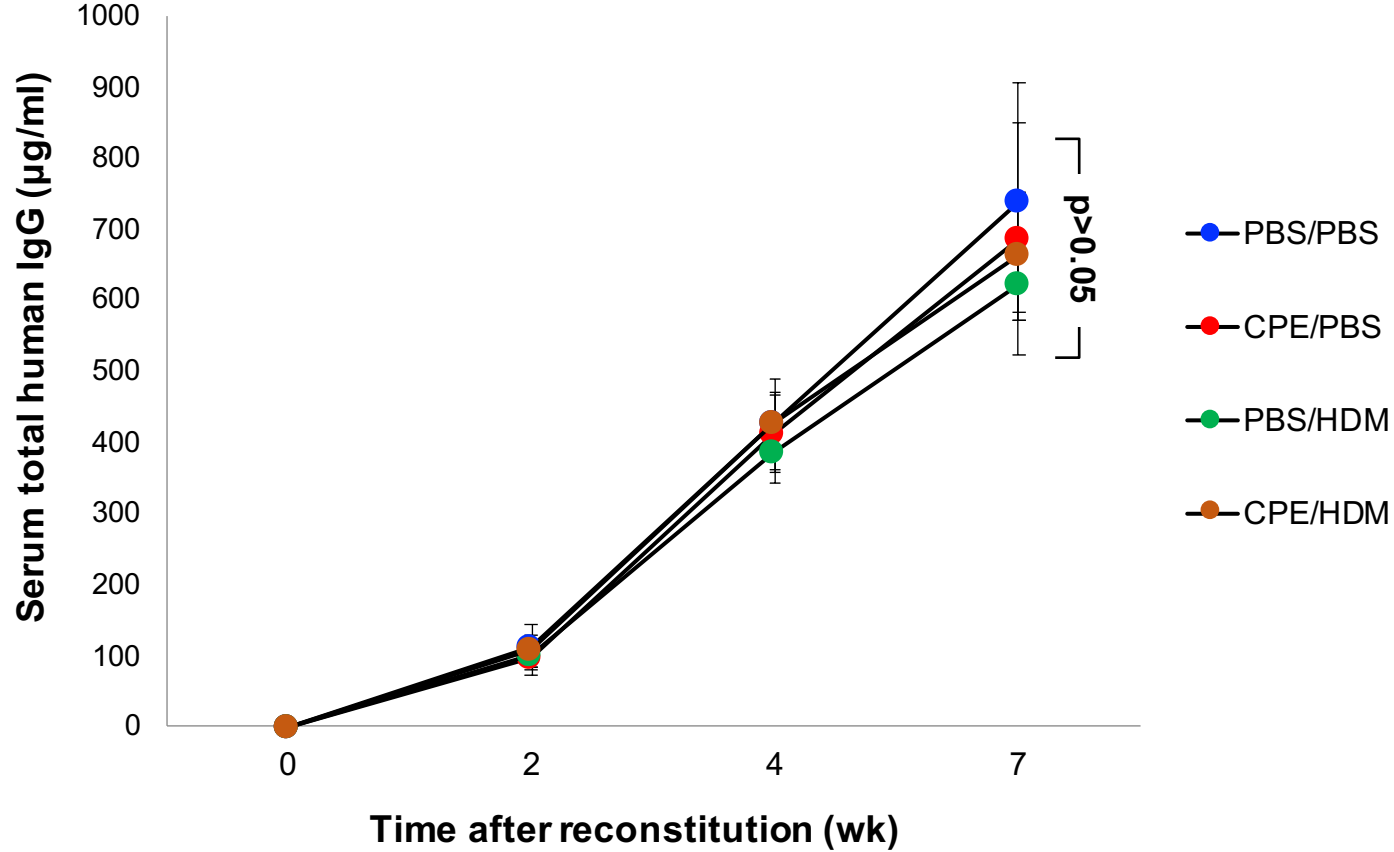

Supplement: CEI-202-300-s001.pdf [file CEI-202-300-s001.pdf]
